# Supplementary figures and images for: Localization effect for doping and collaborative diffusion in Er3+:YAG melt
Source: Royal Society of Chemistry journal article supplement (doi:10.1039/d3ce01081c), 2023-12-12

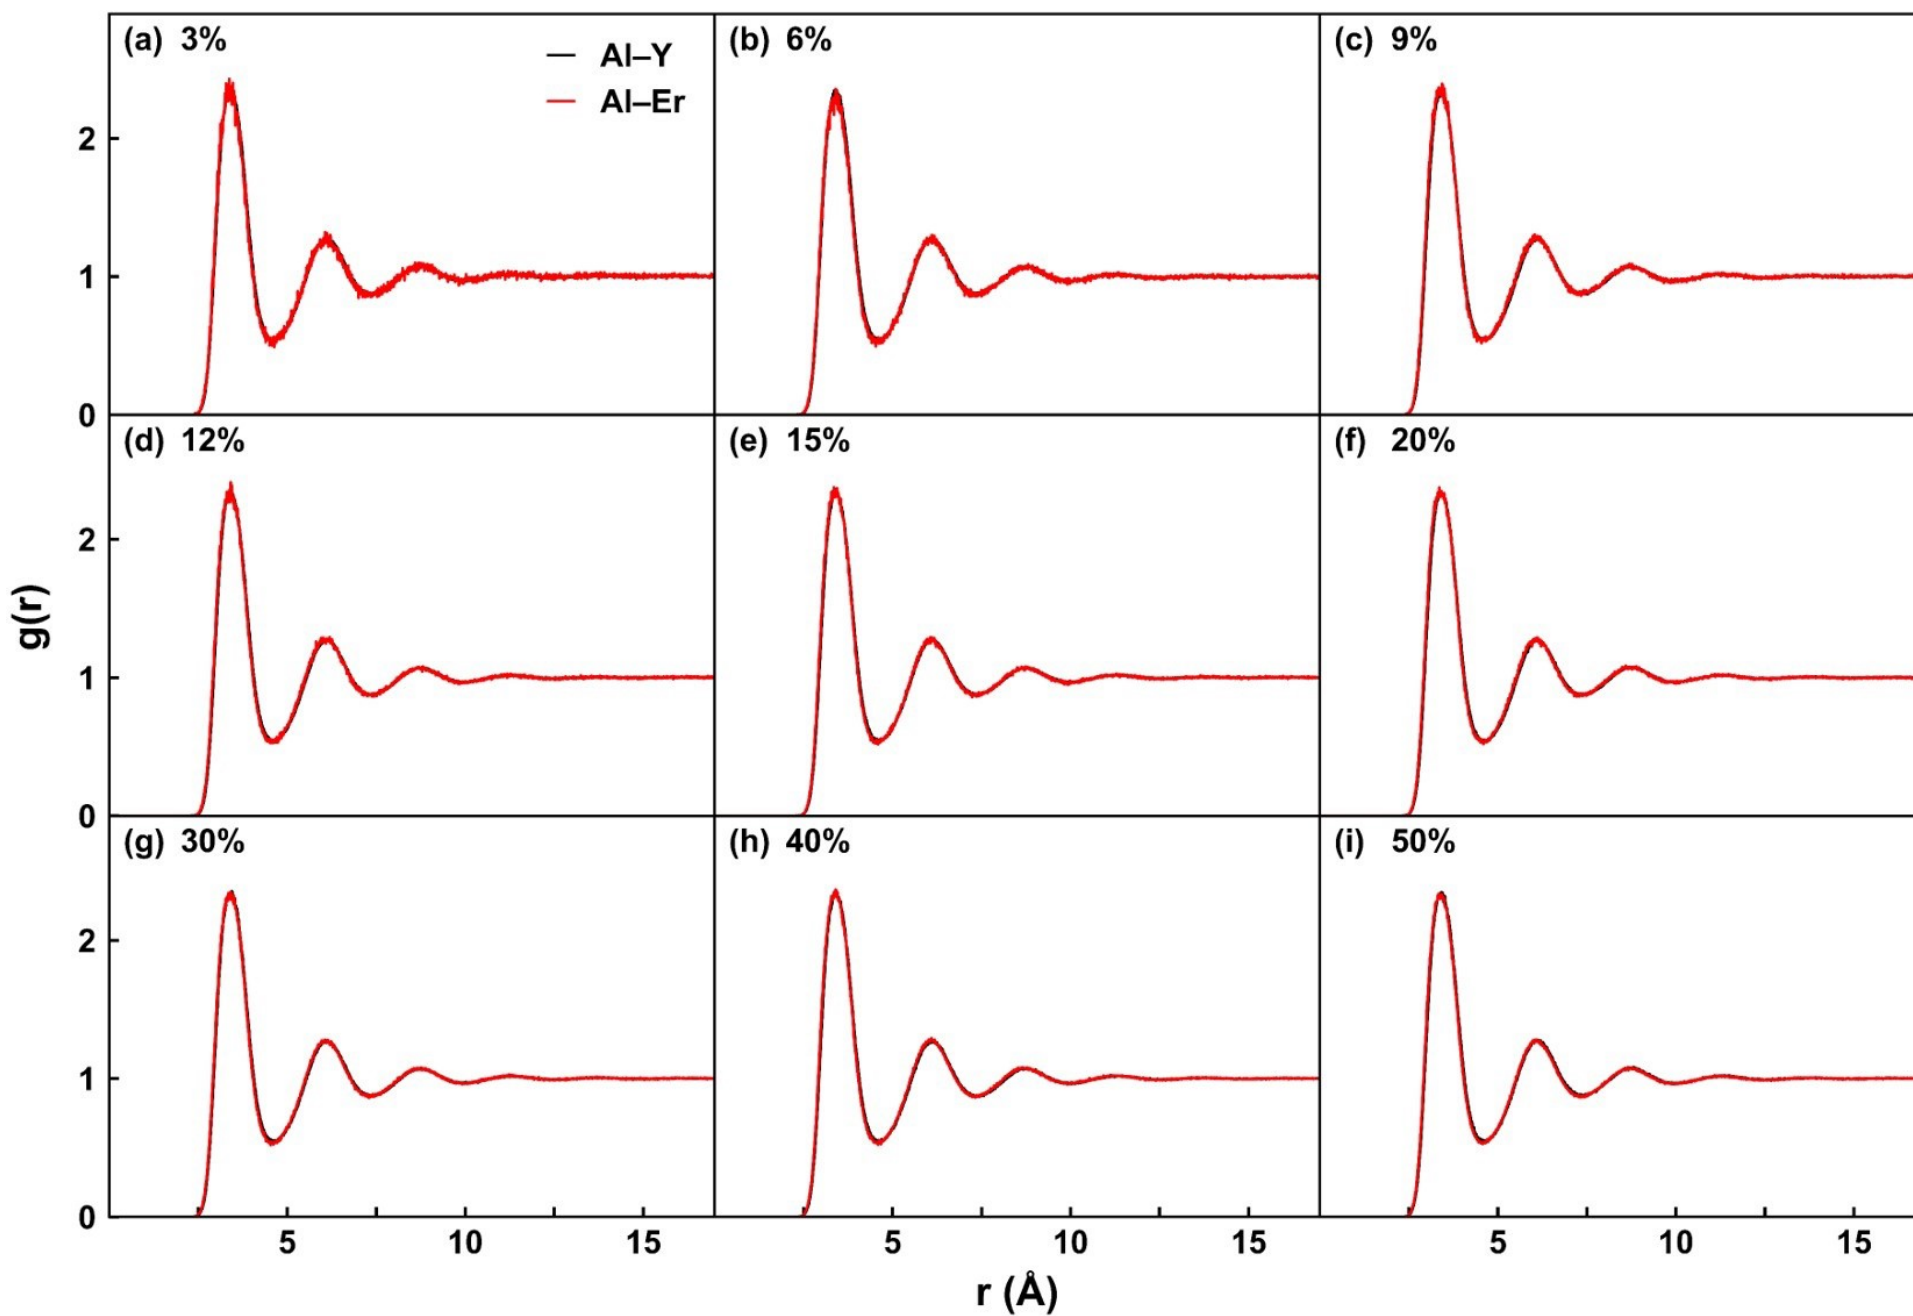

Supplement: d3ce01081c10.pdf [file d3ce01081c10.pdf]

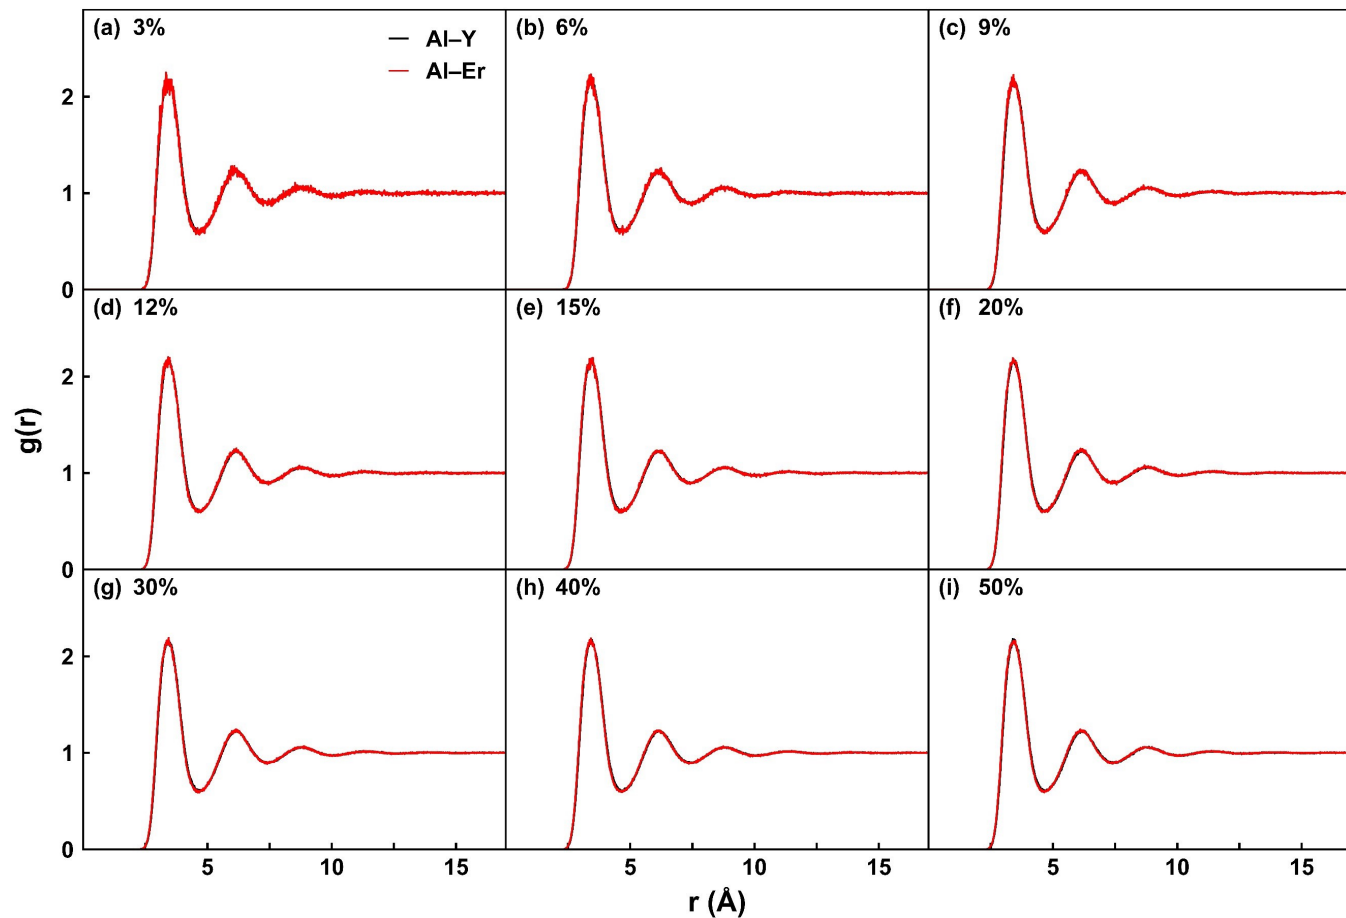

Supplement: d3ce01081c11.pdf [file d3ce01081c11.pdf]

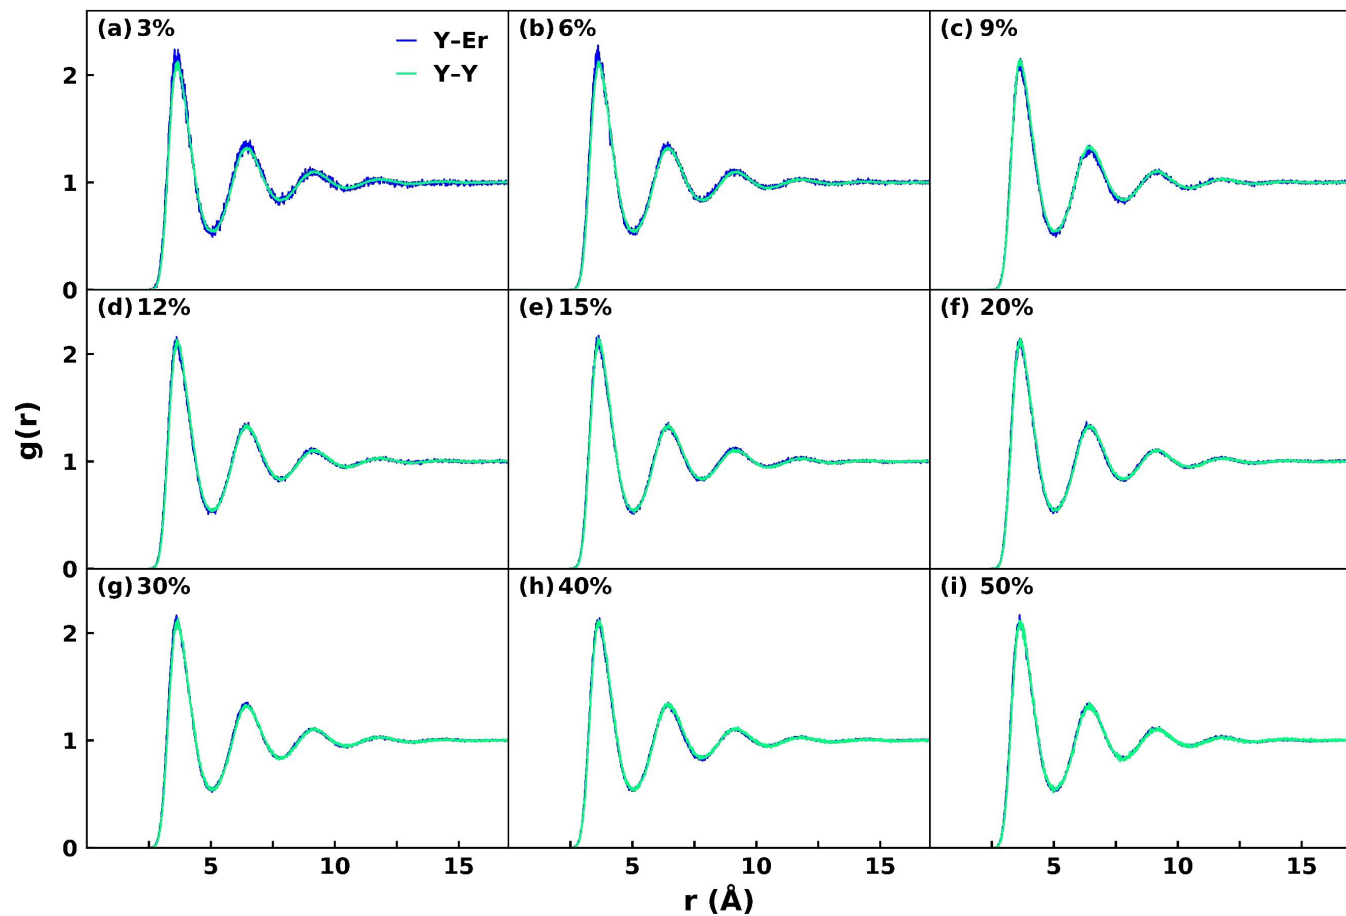

Supplement: d3ce01081c12.pdf [file d3ce01081c12.pdf]

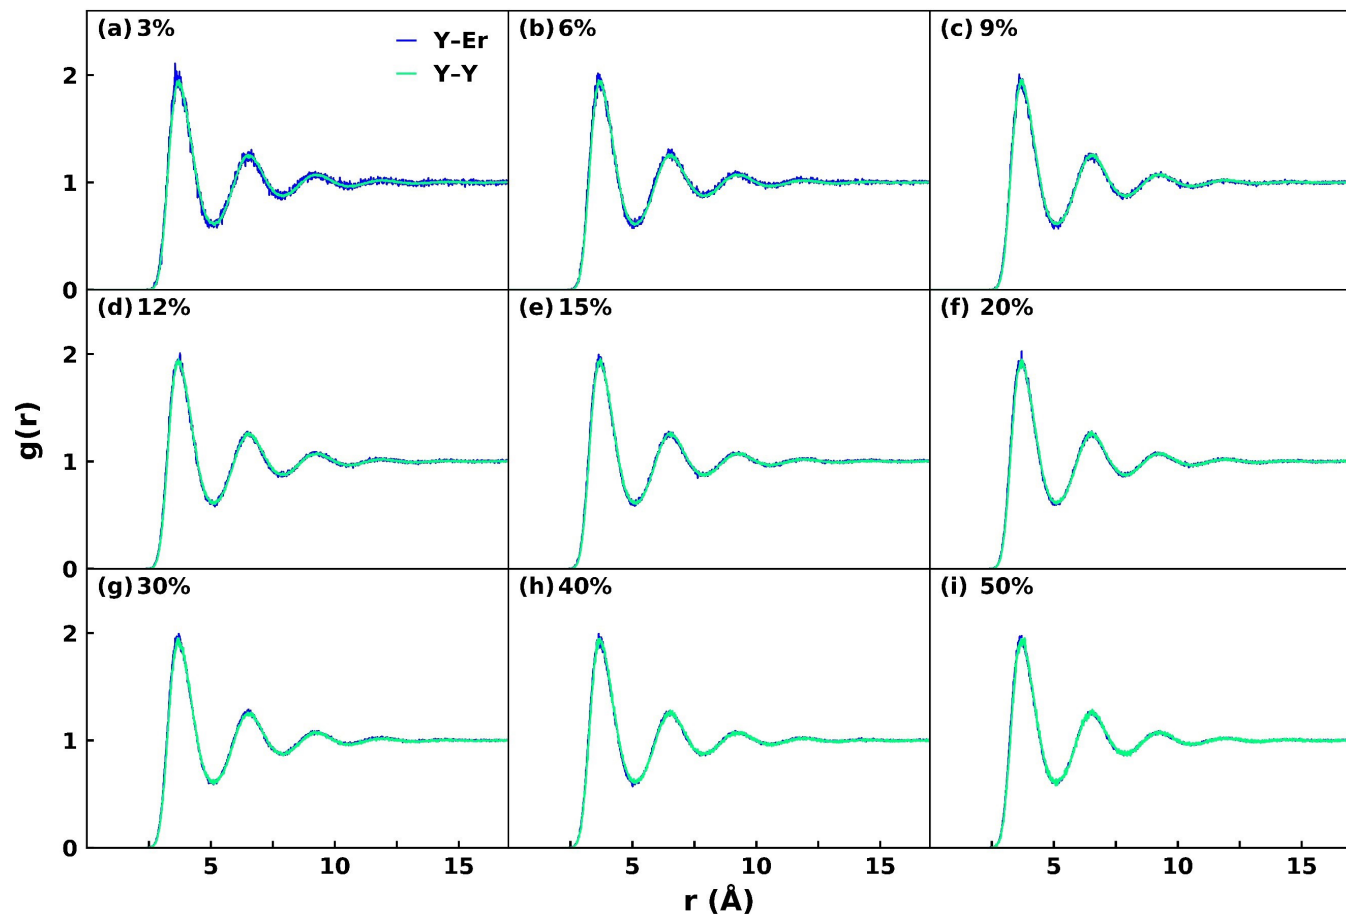

Supplement: d3ce01081c13.pdf [file d3ce01081c13.pdf]

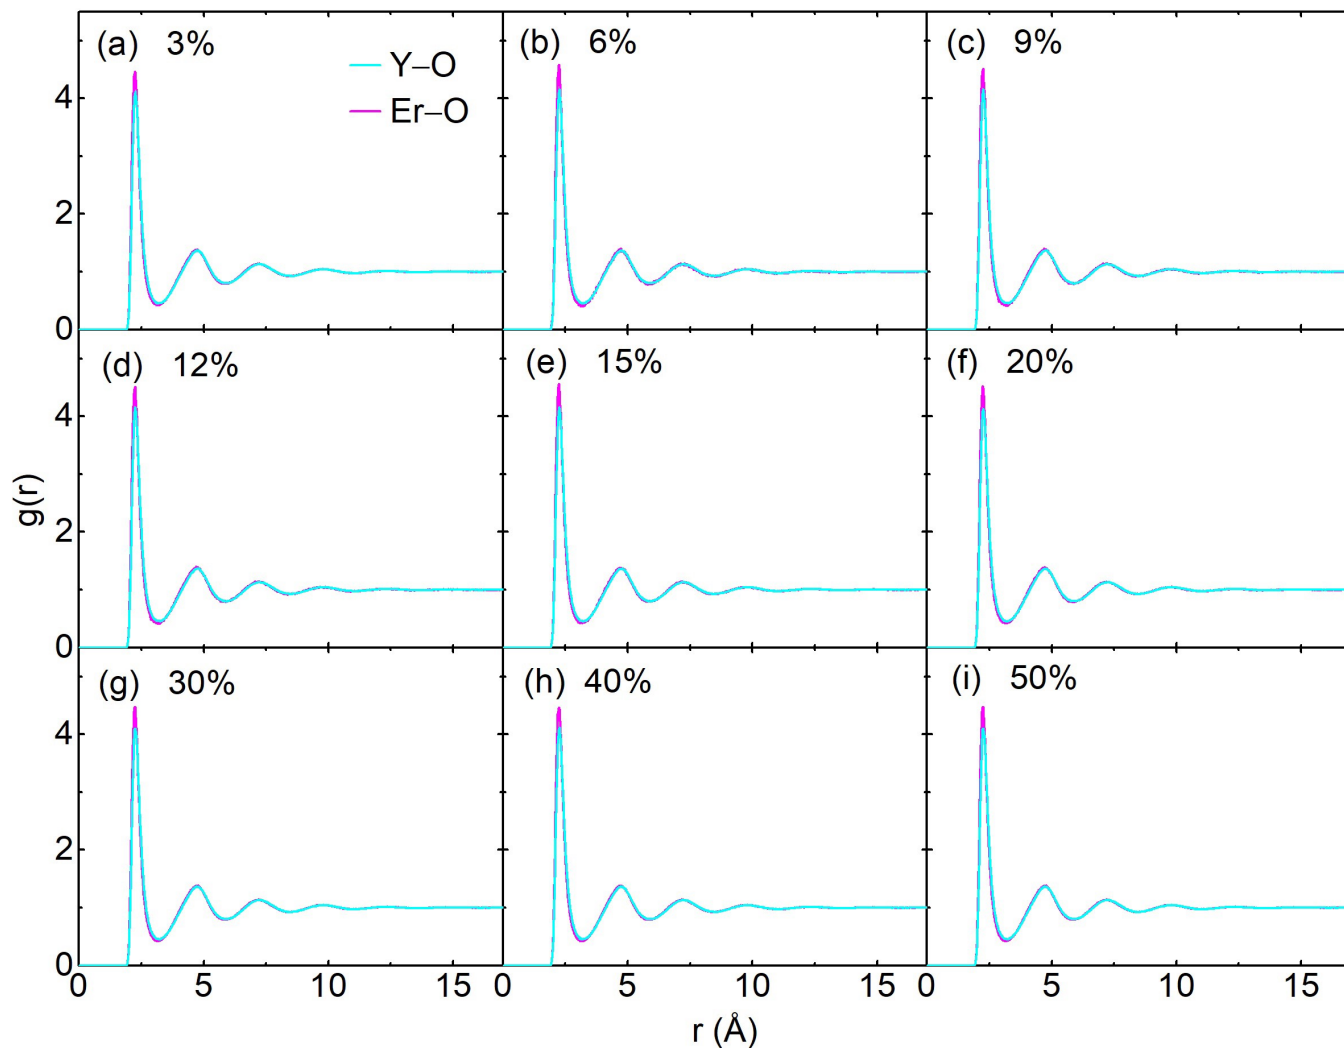

Supplement: d3ce01081c14.pdf [file d3ce01081c14.pdf]

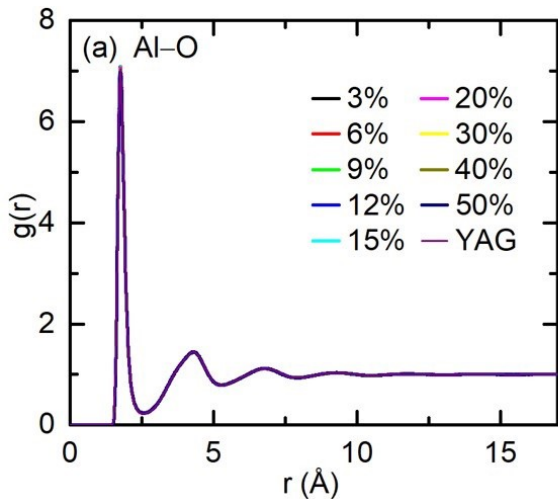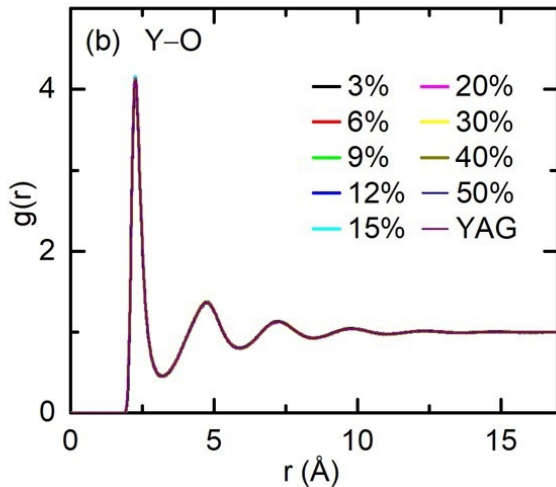

Supplement: d3ce01081c2.pdf [file d3ce01081c2.pdf]

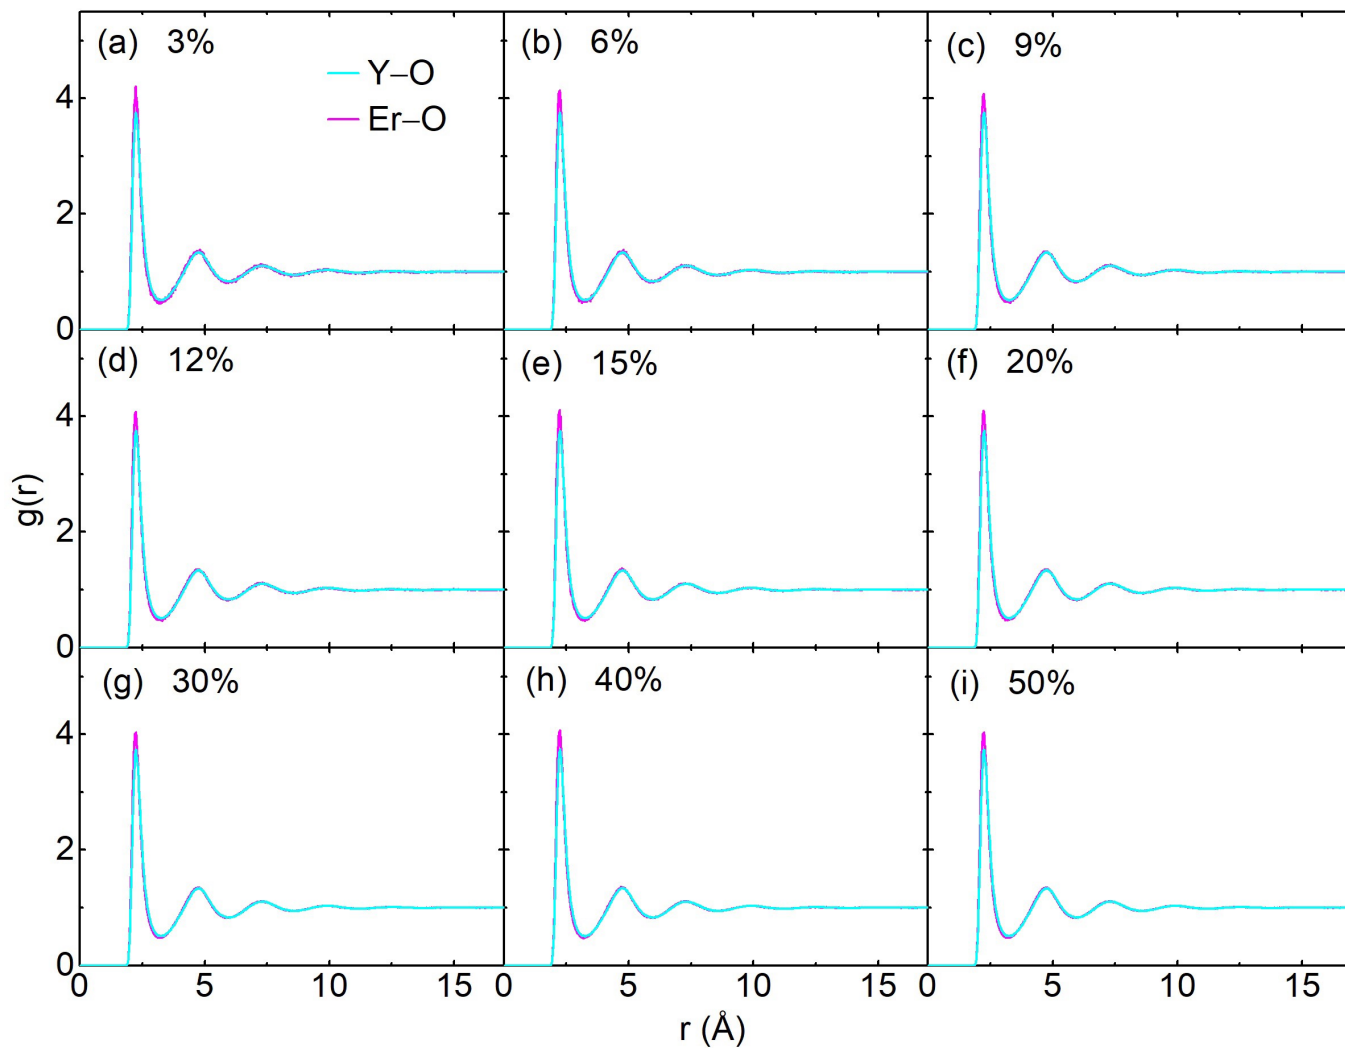

Supplement: d3ce01081c3.pdf [file d3ce01081c3.pdf]

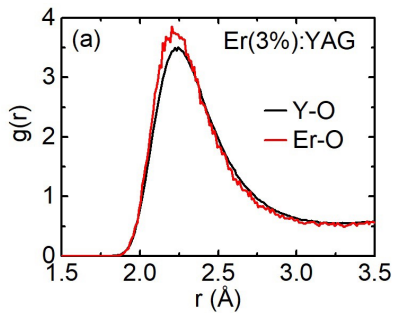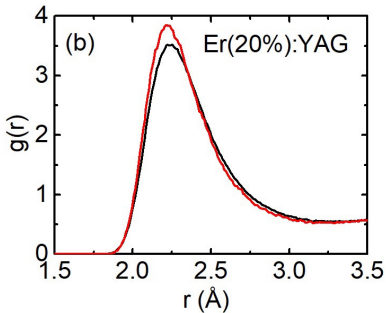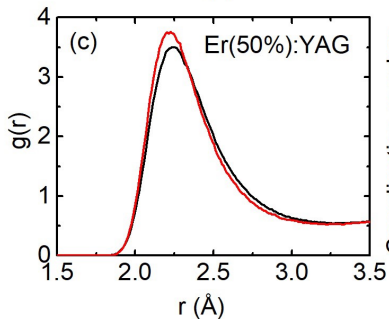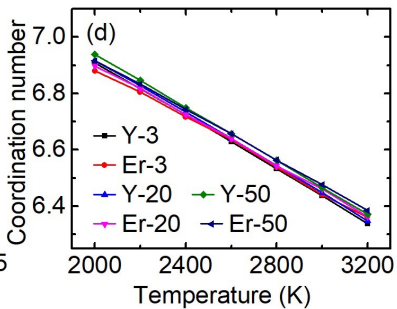

Supplement: d3ce01081c4.pdf [file d3ce01081c4.pdf]

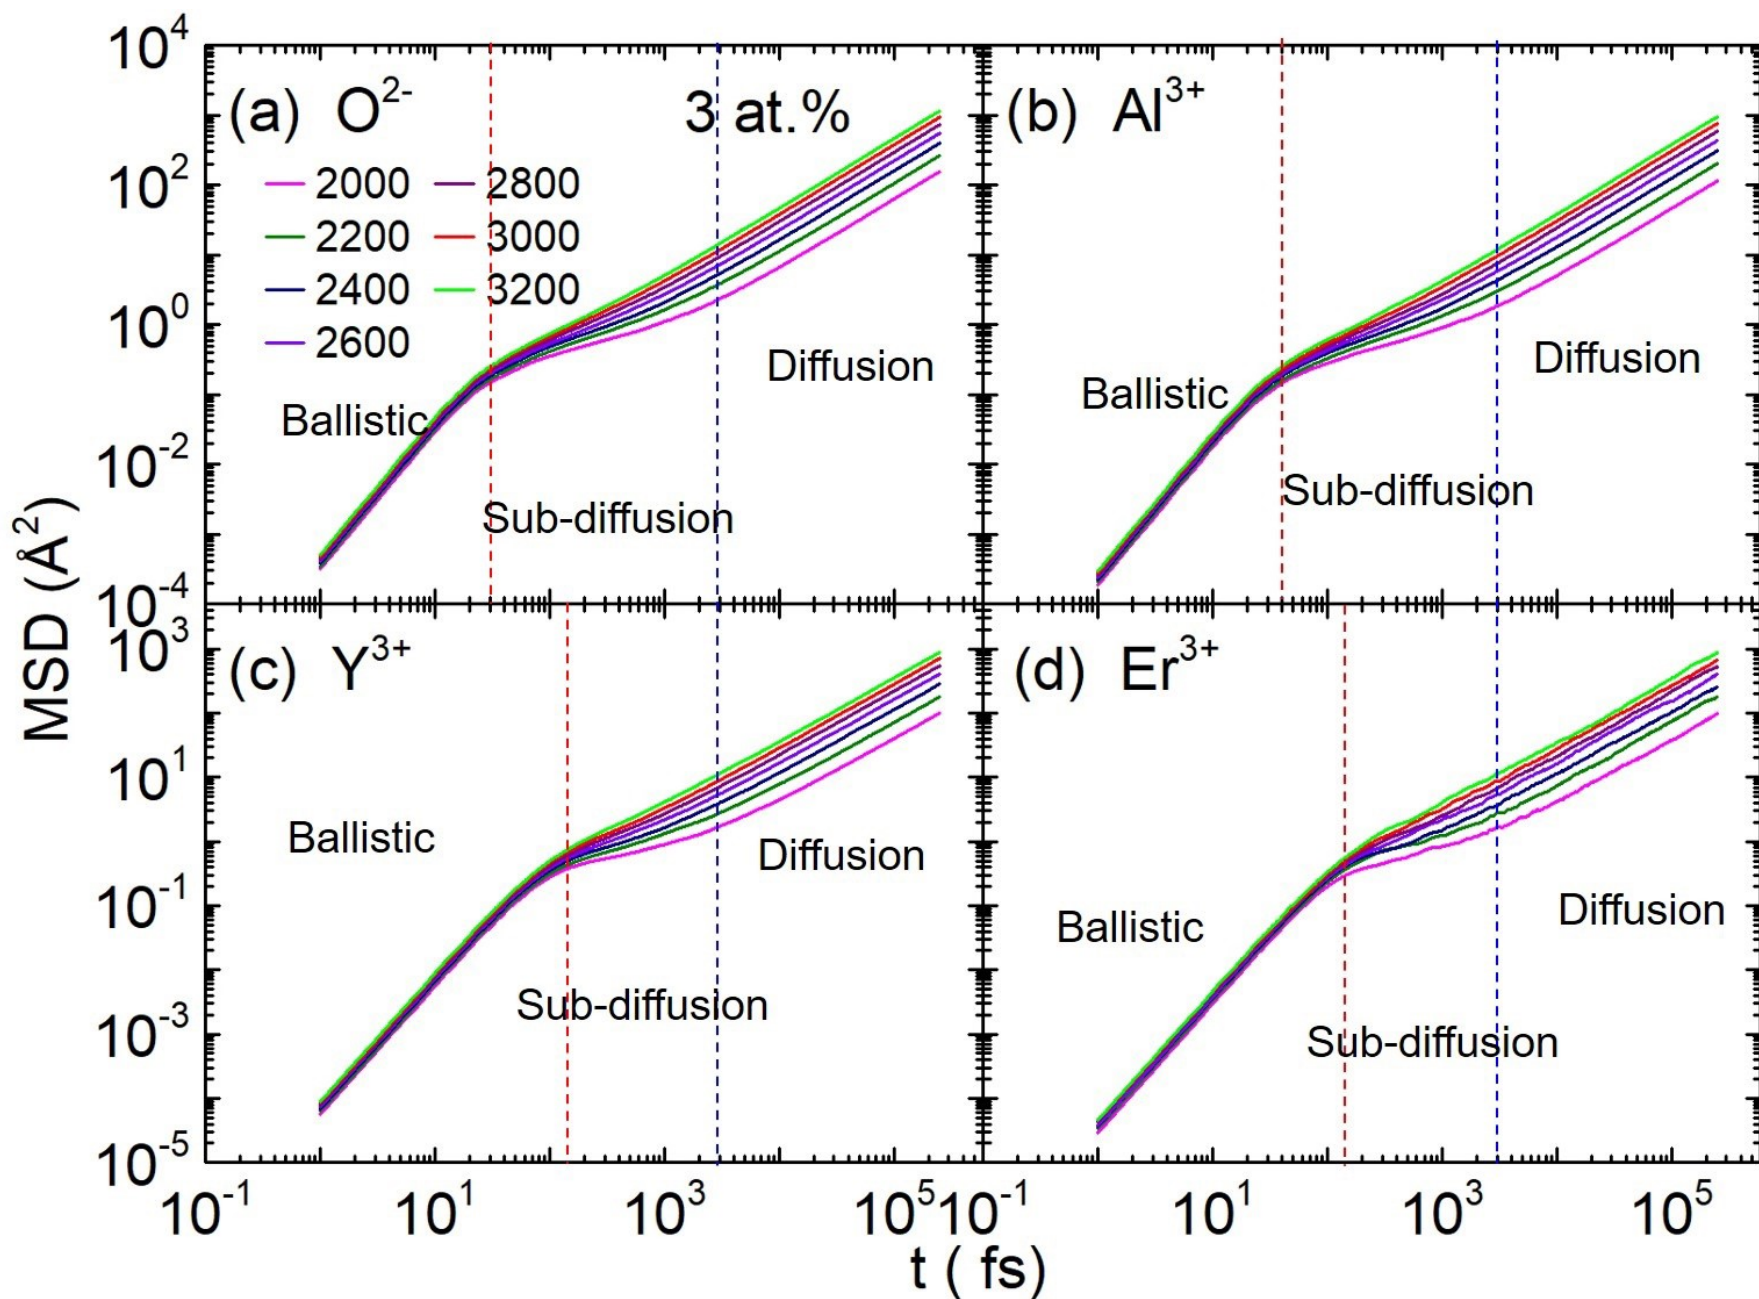

Supplement: d3ce01081c5.pdf [file d3ce01081c5.pdf]

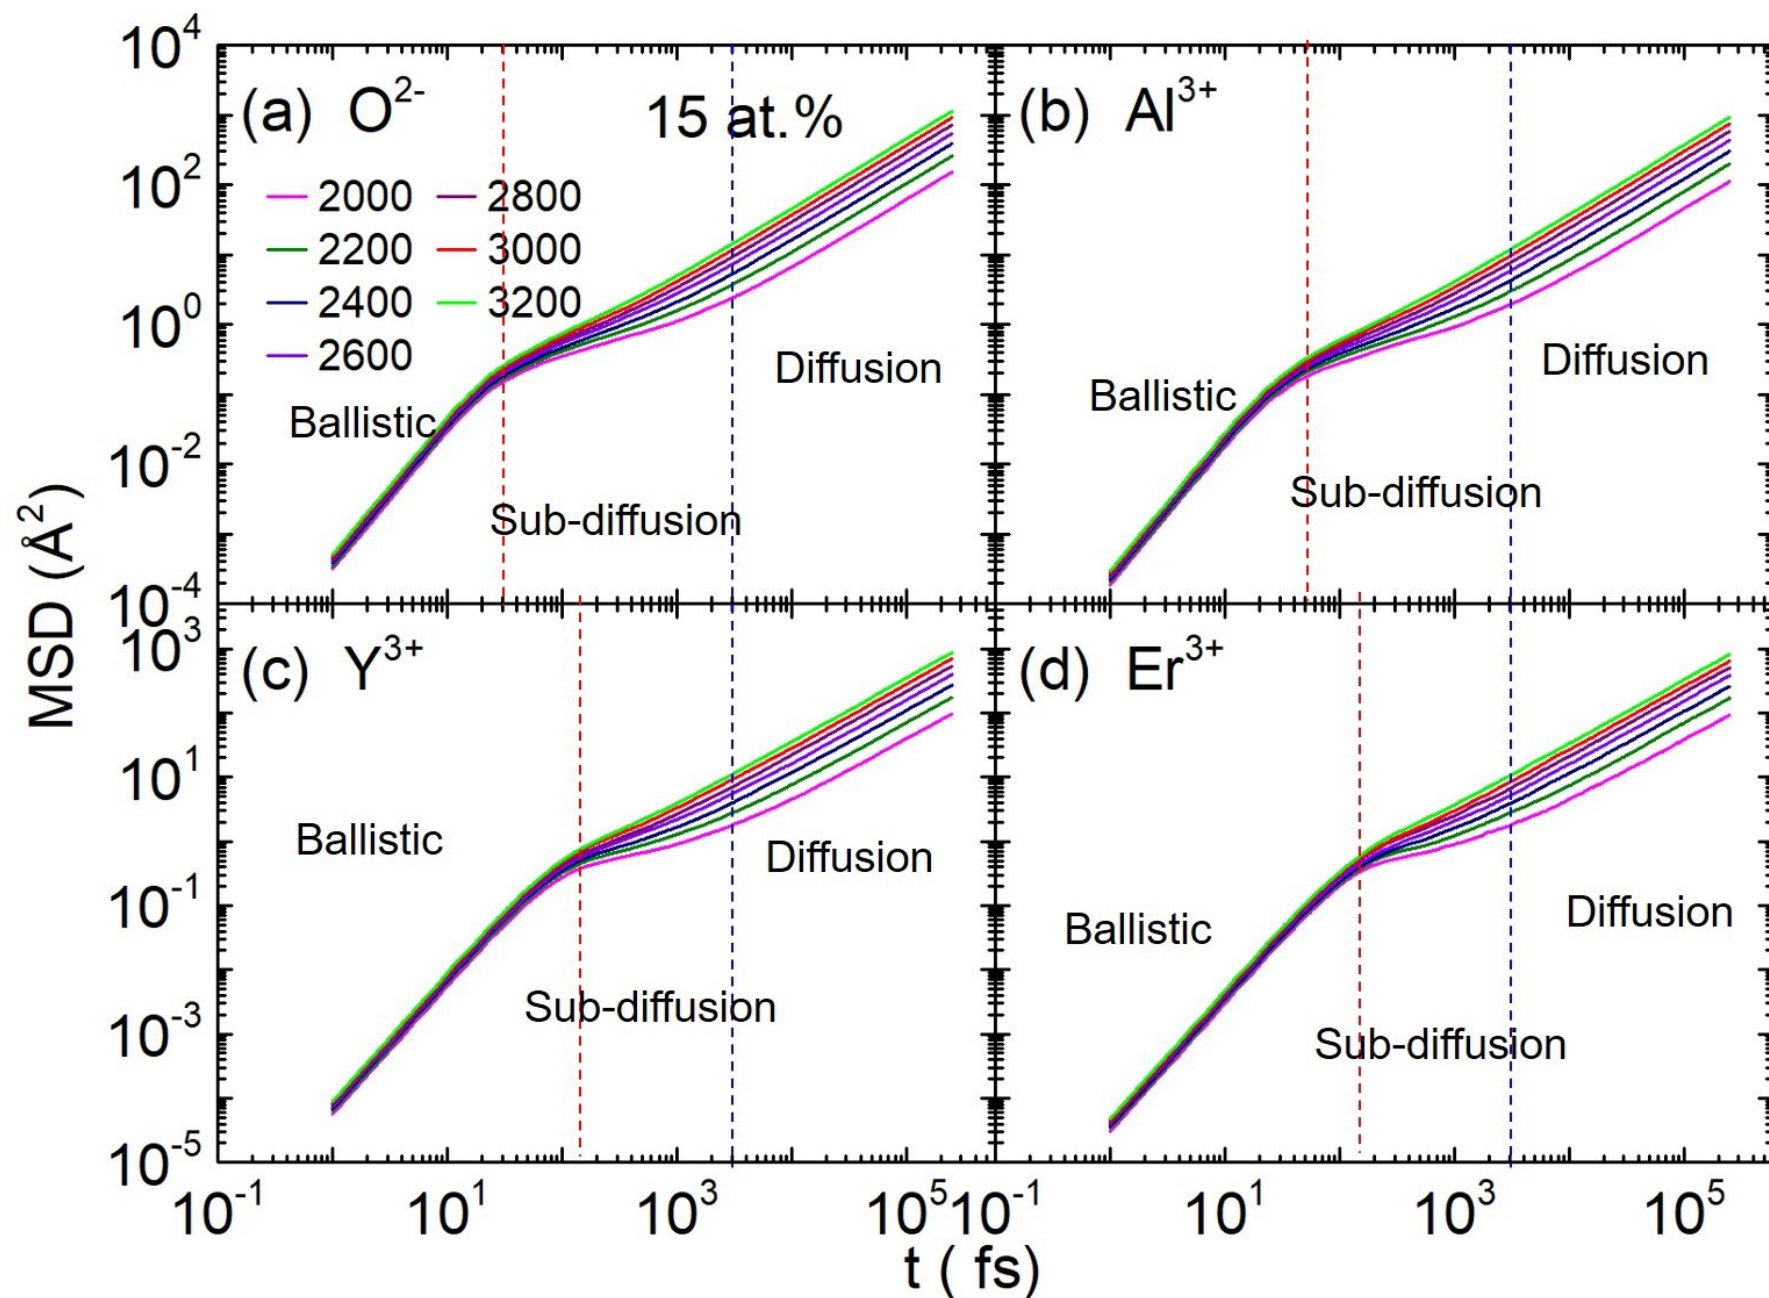

Supplement: d3ce01081c6.pdf [file d3ce01081c6.pdf]

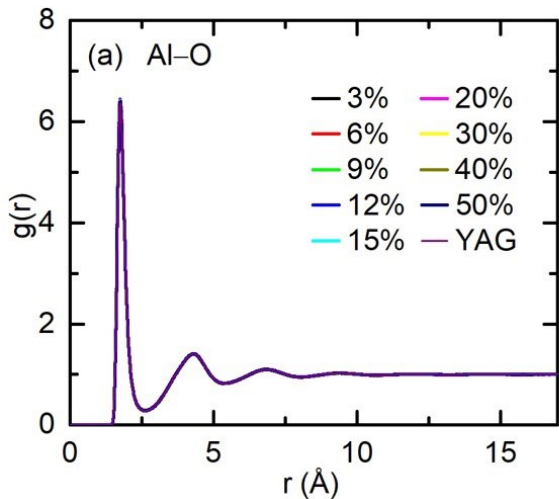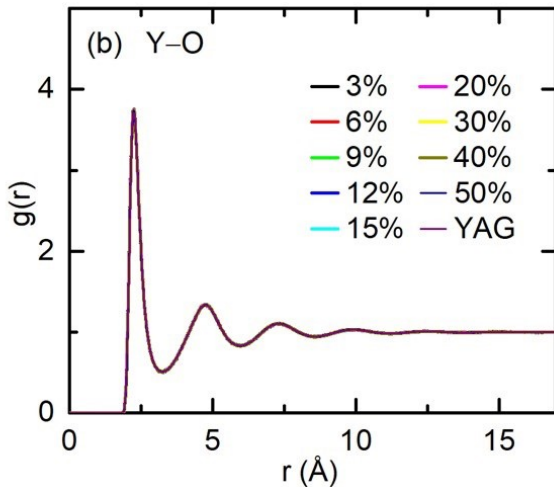

Supplement: d3ce01081c7.pdf [file d3ce01081c7.pdf]

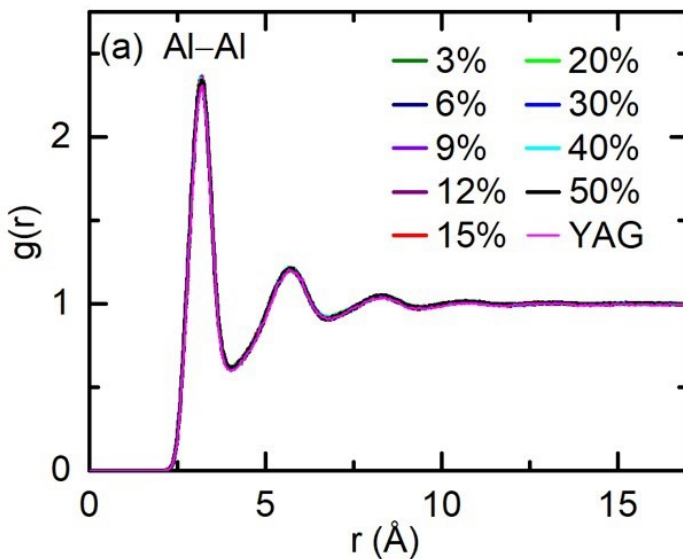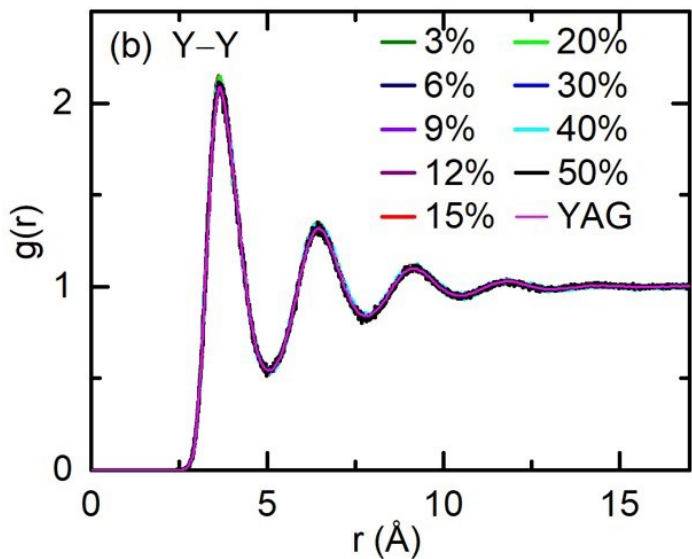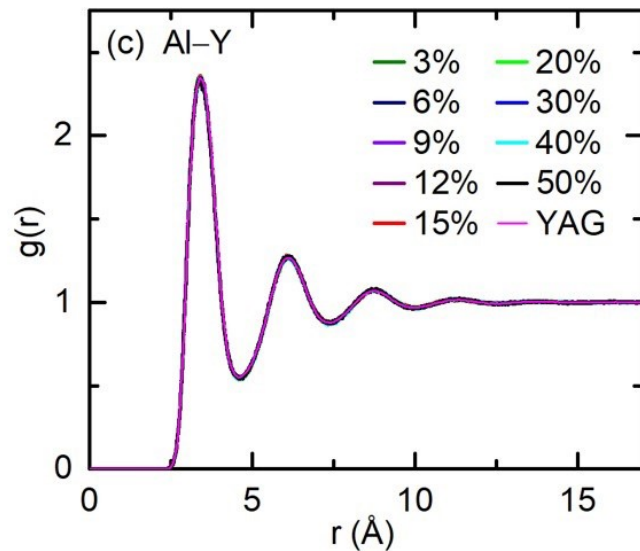

Supplement: d3ce01081c8.pdf [file d3ce01081c8.pdf]

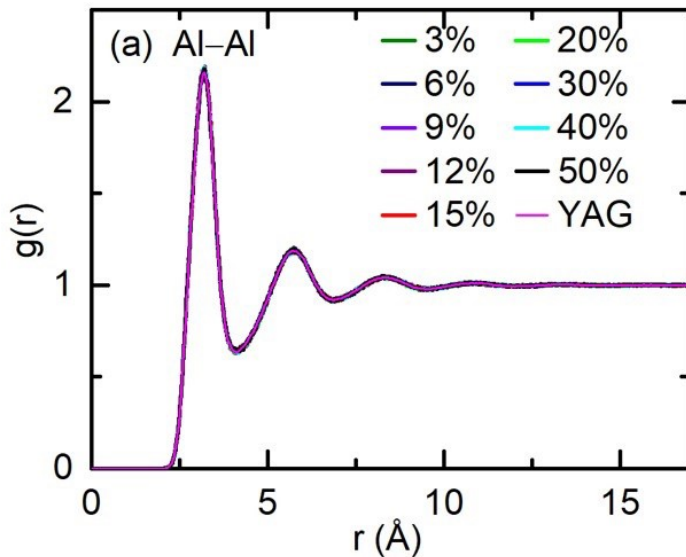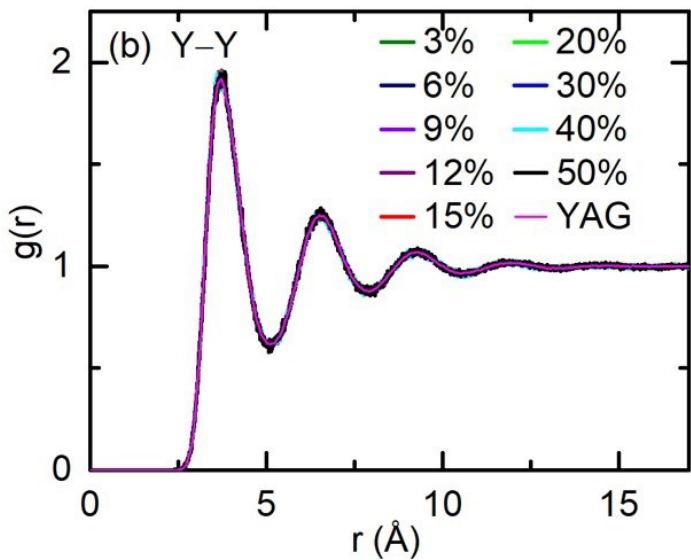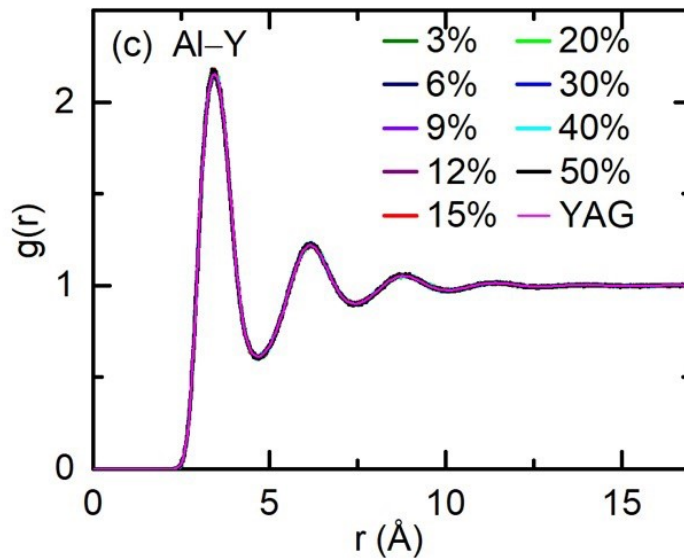

Supplement: d3ce01081c9.pdf [file d3ce01081c9.pdf]
